# Supplementary material for: Effect of induced hyperopia on fall risk and Fourier transformation of postural sway
Source: PeerJ. 2019 Dec 20;7:e8329. doi: 10.7717/peerj.8329 (PMC6927353; doi:10.7717/peerj.8329)
Supplement: Supplemental Information 1 [file peerj-07-8329-s001.xlsx]

## Sheet: general eye exams
	sex	age	full correction(OD)			full correction(OS)			Decimal Visual acuity in Binocular													Phria test (- )Exo / (+) Eso		Accommodation amplitude (Dioper)		Stereopsis
									eyes open with full correction	1D myopia	2D myopia	3D myopia	4D myopia	5D myopia	6D myopia	1D hyperopia	2D hyperopia	3D hyperopia	4D hyperopia	5D hyperopia	6D hyperopia	Distance	Near	Right eye	Left eye	sec/arc
1	male	20	S: -1.75	C: 0	AX: 0	S: -1.75	C: 0	AX: 0	1.2	0.6	0.3	0.15	0.15	0.05	0.05	1	1	1	1	0.9	0.6	-1	-2	12	13	40
2	male	20	-5.5	-0.25	170	-5	-0.5	160	0.9	0.5	0.3	0.3	0.15	0.15	0.1	0.8	0.6	0.5	0.4	0.2	0.2	-3	-5	14	13.5	40
3	male	20	0	-0.5	45	0	-0.5	165	1.2	0.6	0.4	0.2	0.15	0.1	0.05	1	1	1	1	0.2	0.2	-2	-5	11	11	50
4	female	21	-9.5	-1	15	-10.25	-2.5	15	1	0.5	0.5	0.3	0.1	0.1	0.05	0.6	0.6	0.5	0.3	0.2	0.05	1	-4	11.5	12	50
5	female	22	0.25	-0.75	75	-0.75	0	0	1.2	0.5	0.4	0.2	0.1	0.05	0.05	1	0.9	0.9	0.9	0.8	0.7	-3	-6	13	13.5	40
6	female	23	0.5	-0.5	15	0	-0.5	180	1	0.8	0.3	0.15	0.1	0.05	0.05	1	1	0.9	0.9	0.7	0.6	0	1	10.5	10.5	40
7	male	25	-0.25	-3	180	0.25	-3	180	1.2	0.5	0.3	0.2	0.2	0.1	0.05	1.2	1	0.8	0.6	0.4	0.4	0	-2	12	12	40
8	female	23	-3	0	0	-2.75	0	0	1.2	0.4	0.2	0.15	0.1	0.05	0.05	1.2	1.2	1.2	1	1	0.5	0	-3	10	10	40
9	male	20	-3.5	-0.5	160	-3.25	0	0	1	0.5	0.3	0.2	0.1	0.1	0.05	1	1	0.8	0.4	0.2	0.1	0	-1	12	12	40
10	male	20	-5.5	-0.75	10	-5.25	-0.5	145	1	0.9	0.4	0.3	0.1	0.05	0.02	0.9	0.6	0.6	0.2	0.1	0.1	0	-3	12	12.5	40
11	male	20	-3.5	-0.5	45	-2	-1.5	160	1	0.9	0.4	0.2	0.1	0.1	0.05	1	1	0.9	0.9	0.7	0.6	-1	-3	13	13.5	40
12	male	20	-2.5	-3.75	180	-1.5	-4.5	180	1	0.6	0.4	0.3	0.3	0.3	0.02	0.9	0.6	0.5	0.3	0.3	0.3	0	-5	11.5	10.5	40
13	female	20	-8	-0.5	50	-7.5	-0.5	180	1	0.3	0.3	0.3	0.3	0.2	0.02	0.9	0.9	0.9	0.6	0.3	0.2	-3	-5	12	13	50
14	female	21	-4.75	0	0	-4.5	0	0	1	0.4	0.3	0.1	0.1	0.1	0.05	1	1	1	1	0.6	0.2	-2	-5	12	13	50
15	female	21	0	0	0	0.25	-0.25	165	1.5	0.6	0.1	0.05	0.02	0.02	0.02	1.2	1.2	0.8	0.4	0.3	0.1	-3	-6	10	10	40
16	male	22	-6.5	-2.25	180	-5.75	-2.75	180	1	0.4	0.2	0.05	0.02	0.02	0.02	1	1	1	1	1	0.8	-3	-6	12	12	40
17	male	22	0	-0.5	5	-1	0	0	1.2	0.6	0.1	0.1	0.05	0.02	0.02	1	1	0.9	0.8	0.8	0.7	0	-5	11	11	40
18	male	22	-6.25	-1.25	165	-7.25	-1.25	30	1.2	0.6	0.2	0.05	0.02	0.02	0.02	1.2	0.9	0.9	0.9	0.8	0.8	1	1	11.5	11	40
19	male	22	-7.5	-0.5	175	-7.25	-0.75	120	1.2	0.9	0.4	0.3	0.2	0.2	0.02	1.2	1.2	0.8	0.5	0.2	0.1	-3	-5	12.5	13	40
20	male	24	0.5	0	0	0.5	0	0	1	0.5	0.8	0.3	0.1	0.1	0.05	0.9	0.9	0.9	0.9	0.8	0.6	1	0	14	14	50
21	female	21	-4	-1.25	15	-4	-2	5	1	0.5	0.4	0.3	0.1	0.1	0.05	1	1	0.9	0.8	0.6	0.5	-3	-4	12.5	12	40
22	female	23	-1.75	0	0	-1.75	0	0	1.2	0.7	0.2	0.15	0.15	0.05	0.02	1.2	1.2	1	1	0.9	0.8	-3	-6	12	12	40
23	male	24	-5.75	-1.5	170	-6.5	-2	180	1	0.5	0.3	0.2	0.1	0.05	0.02	1	1	1	0.9	0.9	0.8	-1	-3	10	10.5	40
24	female	23	-5.75	-0.5	15	-6.5	-0.5	180	1	0.5	0.5	0.2	0.1	0.05	0.02	1	1	0.9	0.8	0.8	0.6	0	-3	10	10.5	40
25	female	23	-4.25	-1	170	-3.75	-1.5	10	1.2	0.6	0.3	0.2	0.1	0.1	0.05	1.2	1.2	1.2	1.2	0.8	0.7	0	-5	14	14	50
26	male	26	-3.5	-4.5	5	-3	-4.25	162	1	0.5	0.5	0.3	0.2	0.2	0.02	0.9	0.9	0.9	0.9	0.9	0.8	0	-6	12.5	13	40
27	male	25	0	0	0	0	0	0	1.5	0.8	0.2	0.1	0.05	0.05	0.02	1.2	1.2	1.2	1.2	1.2	1.2	1	-1	11	12	50
28	male	26	-1	-1.5	180	0.25	-3.5	30	1	0.7	0.2	0.1	0.05	0.02	0.02	1	1	0.9	0.8	0.6	0.5	-3	-6	12.5	13	40
29	male	25	1	0	0	0.75	0	0	1	0.4	0.2	0.05	0.02	0.02	0.02	1	1	1	1	0.6	0.6	-3	-4	13	13	40
30	male	25	-2.25	-0.5	160	-2	-1	175	1.2	0.5	0.2	0.1	0.1	0.05	0.02	1.2	1.2	1.2	1.2	0.9	0.6	-3	-5	10.5	10	40
31	male	26	-3.25	-1.5	180	-2.75	-1.5	175	1.2	0.5	0.1	0.1	0.05	0.02	0.02	1.2	1	1	0.7	0.2	0.05	-3	-4	12	12	50
32	male	27	-4.75	0	0	-4.75	-0.75	180	2	0.8	0.4	0.3	0.2	0.1	0.05	1.5	1	0.7	0.2	0.2	0.1	-3	-5	10.5	10	40
33	male	27	0	0	0	-0.5	0	0	1.5	0.6	0.3	0.1	0.1	0.02	0.02	1.2	1.2	1	0.9	0.9	0.7	2	-1	11	11.5	40
34	male	26	-1.75	-1.5	180	-1.5	-1.25	180	1	0.4	0.2	0.05	0.02	0.02	0.02	1	1	0.9	0.9	0.8	0.2	-2	-5	12	12	40
35	male	24	-1.25	-1.25	180	-1.5	-1.25	180	1.5	0.6	0.3	0.1	0.1	0.05	0.02	1.5	1.2	1.2	1	0.8	0.5	-2	-6	14	14	40
36	female	23	-5.5	-0.5	30	-4.75	-1.5	170	1.2	0.6	0.4	0.1	0.05	0.02	0.02	1.2	1	0.9	0.5	0.1	0.05	-3	-6	13	13	40
37	male	26	-0.25	-2.75	175	0	-2.75	180	1.2	0.4	0.2	0.1	0.1	0.05	0.02	1.2	1	0.9	0.8	0.4	0.2	-2	-4	12	12.5	40
38	female	24	-3.25	-0.5	10	-3.25	-0.75	175	1.2	0.6	0.2	0.1	0.05	0.05	0.02	1	0.9	0.6	0.2	0.1	0.05	-1	-6	11.5	12	40
39	female	23	-0.5	-0.25	180	-0.25	-0.25	180	1.2	0.3	0.2	0.1	0.05	0.02	0.02	1.2	1.2	1	0.9	0.8	0.4	0	0	12	11.5	40
40	female	23	-4.25	-1.5	15	-4.75	-1.5	165	1	0.3	0.2	0.1	0.05	0.02	0.02	1	0.9	0.6	0.2	0.1	0.05	-2	-2	14	14	40
41	male	23	-3	-1	180	-2.5	-1	5	1	0.7	0.3	0.05	0.05	0.05	0.05	1	0.8	0.6	0.2	0.05	0.05	-1	-2	11	11.5	40
42	male	21	-4	-2	175	-5.25	-2	170	1	0.8	0.3	0.1	0.05	0.05	0.05	1	0.8	0.5	0.2	0.05	0.05	-2	-5	12	12	40
43	male	24	-3.25	-1	175	-6.25	-1.5	180	1.2	0.4	0.1	0.05	0.05	0.05	0.05	0.9	0.8	0.6	0.3	0.1	0.05	1	1	11.5	12	40
44	male	25	0	0	0	0	0	0	1	0.5	0.2	0.05	0.05	0.05	0.05	1	1	0.8	0.4	0.3	0.05	0	-2	13	12.5	40
45	male	22	-1.25	-3	170	-0.5	-4	10	1	0.8	0.6	0.3	0.1	0.05	0.05	1	0.8	0.6	0.6	0.5	0.2	0	0	12	12	0
46	male	24	0.75	0	0	0.75	0	0	1.5	0.8	0.4	0.3	0.2	0.1	0.05	1.5	1.5	1	0.8	0.6	0.4	0	-2	10	10.5	40
47	female	20	-0.75	-0.75	105	-0.75	0	0	1	0.7	0.5	0.1	0.05	0.05	0.05	0.9	0.6	0.4	0.2	0.05	0.05	-2	-6	12	12	40
48	female	20	-8.75	-3	10	-9	-2.25	180	0.9	0.4	0.1	0.05	0.05	0.05	0.05	0.5	0.2	0.05	0.05	0.05	0.05	-3	-5	11	11.5	50
49	male	21	0	-0.5	45	0	-0.5	165	1.2	0.8	0.3	0.2	0.05	0.05	0.05	1.2	1.2	1	1	0.5	0.2	0	0	13	12.5	40
50	male	21	0	0	0	0	0	0	1	0.7	0.4	0.2	0.1	0.05	0.05	1	1	0.9	0.9	0.3	0.1	0	-4	11.5	12	40
51	male	21	-7	-3.25	180	-6	-2.75	180	1	0.7	0.5	0.1	0.05	0.05	0.05	0.7	0.6	0.6	0.6	0.3	0.3	-2	-3	13	13	40

## Sheet: FI
	Fall risk index
	eyes open	eyes closed	1D myopia	2D myopia	3D myopia	4D myopia	5D myopia	6D myopia	1D hyperopia	2D hyperopia	3D hyperopia	4D hyperopia	5D hyperopia	6D hyperopia
1	10	10	10	6	14	14	8	4	8	10	16	12	14	18
2	4	0	5	0	5	0	2	2	0	0	0	0	0	0
3	2	2	5	4	10	8	2	4	4	0	0	2	10	10
4	6	10	2	10	11	6	8	10	14	6	8	14	12	14
5	5	8	4	2	4	0	2	4	0	4	2	4	4	2
6	4	4	0	2	8	2	2	2	8	4	2	6	6	4
7	5	12	8	0	0	0	2	2	6	0	0	0	2	2
8	0	2	0	0	0	0	0	4	2	0	36	0	8	0
9	4	4	2	4	0	0	2	2	0	4	2	6	2	2
10	5	0	0	0	4	0	10	6	2	12	2	6	0	4
11	0	2	0	2	0	6	9	6	0	4	0	0	2	4
12	5	6	0	2	2	6	2	2	0	10	2	6	4	0
13	0	8	10	2	8	4	10	8	10	10	4	2	8	4
14	2	4	0	2	0	8	0	2	2	2	0	0	0	22
15	6	6	8	4	2	0	6	6	0	4	2	2	4	0
16	5	6	10	6	4	4	10	4	10	4	8	14	10	12
17	6	10	2	10	4	0	2	4	4	2	0	10	4	6
18	0	4	4	8	2	10	6	4	8	12	16	6	8	22
19	5	6	6	10	4	10	2	8	2	6	10	12	8	12
20	0	6	6	2	0	0	0	2	2	6	8	4	12	6
21	6	6	8	4	12	16	10	10	0	2	2	8	16	4
22	0	4	0	2	0	0	14	14	4	2	0	2	2	2
23	4	8	0	8	14	10	6	8	10	2	2	10	6	8
24	2	10	8	8	6	0	9	10	8	0	0	2	2	0
25	0	2	6	6	6	4	2	2	0	0	12	2	0	12
26	6	12	4	6	2	0	4	4	0	0	4	2	14	2
27	2	6	8	4	2	4	6	6	10	8	0	2	4	28
28	6	4	0	2	0	0	0	7	0	0	0	2	0	0
29	4	10	6	10	0	4	6	12	0	0	4	4	0	2
30	6	10	7	7	18	8	2	7	2	16	12	8	16	16
31	4	10	8	10	8	2	8	10	12	14	6	8	0	14
32	2	10	4	2	4	8	2	10	6	4	10	10	16	14
33	4	8	8	12	10	10	4	2	10	10	8	12	10	10
34	5	2	2	0	0	2	0	4	2	0	0	2	6	2
35	2	12	2	5	6	4	4	2	2	4	6	12	14	10
36	4	8	7	0	0	0	0	6	0	0	0	2	4	2
37	0	6	2	5	2	14	4	6	0	4	0	0	0	6
38	5	8	8	7	0	2	4	2	6	8	30	6	6	0
39	0	6	2	0	2	6	0	0	0	0	0	2	2	0
40	0	6	4	4	6	6	6	6	2	8	10	12	2	16
41	4	8	0	0	2	6	10	4	12	14	10	20	6	4
42	6	16	6	2	6	6	4	12	10	6	8	12	6	14
43	3.33333	2	0	0	2	2	2	0	0	0	2	0	0	4
44	0	4	0	0	4	4	4	6	2	2	4	8	12	12
45	7.33333	8	14	6	14	8	18	20	12	8	6	14	14	12
46	1.33333	0	0	0	0	4	0	0	0	2	0	2	0	0
47	4.66667	10	14	10	14	12	6	16	16	12	10	20	16	8
48	12.6667	14	10	14	16	12	16	16	14	12	14	6	8	8
49	7.33333	4	2	10	14	14	8	4	8	14	8	8	2	4
50	3.33333	12	2	2	4	6	6	16	6	4	4	16	8	12
51	15.3333	14	16	12	12	8	12	10	10	10	12	12	14	12

## Sheet: low frequency
	Low frequency
	eyes open	eyes closed	1D myopia	2D myopia	3D myopia	4D myopia	5D myopia	6D myopia	1D hyperopia	2D hyperopia	3D hyperopia	4D hyperopia	5D hyperopia	6D hyperopia
1	34.44	41.55	58.94	33.6	27.29	37.4	59.7	27.91	49.65	47.63	26.2	65.76	34.61	31.27
2	14.94	9.47	18.3	13.72	19.45	15.77	16.01	8.84	34.75	7.73	12.09	8.18	13.67	11.69
3	16.09	29.75	59.89	21.32	20.15	31.1	21.31	17.17	28.03	33.23	13.45	40.27	19.31	41.17
4	40.82	42.36	58.62	23.88	56.95	29.15	54.83	47.25	36.79	34.82	70.51	80.01	69.03	89.47
5	51.04	40.9	19.1	20.55	16.48	9.74	12.68	15.87	16.08	18.81	9.5	11.25	10.93	11.46
6	18.02	13.34	5.61	10.47	24.48	18.56	17.92	19.81	22.69	19.69	16.45	27.41	14.35	21.27
7	25.75	15.93	31.79	26.29	13.56	15.87	30.39	25.06	30.55	15.45	23.74	13.35	27.79	26.08
8	24.29	17.24	17.12	17	12.76	12.28	5.54	13.84	20.9	10.4	9.36	11.62	15.72	15.64
9	13.36	17.52	17.05	44.76	17.03	19.96	11.21	8.5	9.55	30.9	9.32	12.85	20.19	10.29
10	11.59	10.58	13.82	10.91	5.96	17.38	10.75	10.51	14.25	16.51	4.75	12.08	11.53	10.63
11	14.9	21.47	11.96	17.54	13.88	10.59	29.32	12.02	12.91	18.47	15.83	9.59	15.54	23.88
12	15.51	9.25	18.97	15.41	13.97	8.9	17.13	11.15	8.65	9.61	9.69	10.76	5.4	20.06
13	27.2	14.34	19.14	21.52	5.18	25.85	12.84	22.27	14.54	25.99	38.49	14.55	21.76	19.28
14	7.41	6.7	11.58	13.87	14.98	20.74	14.48	17.62	19.66	13.7	11.72	8.32	10.1	7.37
15	15.09	12.81	17.41	15.88	9.9	7.36	8.29	11.06	23.86	12.31	11.28	15.28	19.87	17.23
16	13.54	33.12	27.39	40.81	19.33	31.99	22.03	30.86	8.74	13.1	26.81	24.33	21.35	34.52
17	27.2	36.2	12.26	21.84	22.4	45.48	14.82	43.35	13.02	22.48	30.71	12.43	14.83	19.41
18	21.14	34.22	27.11	37.88	30.8	34.28	16.82	57.23	16.3	32.17	13.43	30.17	17.1	20.96
19	19.84	39.87	22.04	38.05	15.37	16.67	13.44	16.66	24.36	51.72	15.66	18.19	33.5	75.34
20	21.61	7.79	13.5	22.35	11.9	13.87	11.75	16.91	14.37	20.12	20.99	22.6	21.6	26.93
21	25.14	25.11	10.68	19.59	38.49	22.2	11.49	30.78	26.68	17.62	41.82	22.05	14.25	23.09
22	12.28	7.1	7.28	10.7	10.96	17.12	9.67	11.26	20.72	11.26	9.4	18.46	18.84	11.31
23	30.58	35.62	32.84	35.34	57.25	70.72	99.76	46.73	25.59	11.96	49.66	43.78	28.4	28.06
24	14.49	22.11	15.47	15.54	11.03	9.03	16.85	17.47	12.77	6.37	4.53	11.39	15.89	11.75
25	15.22	7.78	14.77	21.08	40.77	35.17	24	4.08	44.54	30.63	17.83	10.37	29.62	14.27
26	32.339	22.7902	17.3997	19.4929	34.6641	16.1795	46.2604	24.6572	12.5903	17.3864	21.3495	25.517	24.6011	29.6132
27	17.7159	16.3407	20.2943	22.8916	19.2518	24.9599	29.0976	21.392	42.034	34.2231	37.6456	35.6621	38.5084	84.9081
28	18.8397	22.7777	4.62756	10.5738	9.08223	5.13095	9.62751	7.92431	8.06216	8.84799	5.33954	14.6722	9.89807	6.79748
29	13.7367	17.7606	29.8907	14.199	15.6277	22.1914	11.5704	14.8523	12.0632	12.9635	9.102	16.1169	13.688	21.1446
30	35.0366	47.4296	57.8738	73.1681	38.5353	37.6998	35.483	21.7416	27.5136	21.9625	41.9162	20.6933	30.2322	18.7908
31	43.5289	50.1109	26.6062	73.1842	38.8613	25.7066	16.3878	55.0843	43.406	48.1377	34.7785	32.1532	37.3213	62.486
32	10.7514	15.2652	11.5141	9.87989	11.2842	5.3829	7.70618	13.5629	7.65829	16.2384	14.4263	19.1741	23.4473	27.152
33	23.4575	15.3726	67.0156	35.1173	55.8377	31.8232	27.6771	21.2747	49.2336	41.7438	52.0267	65.2796	51.5272	61.776
34	36.2949	12.4409	18.8274	21.8681	22.2662	20.7365	24.9179	33.9092	14.3448	22.7119	18.6711	24.0139	17.8155	6.74132
35	17.9401	25.4015	12.1743	18.1376	13.9164	16.965	12.6654	16.729	8.63369	13.3374	19.8189	15.5608	20.9749	12.2863
36	35.7728	24.8769	13.1591	13.0396	19.4794	16.0538	21.7409	29.1972	21.0547	12.6837	19.0349	26.228	19.817	7.93837
37	22.2595	26.0915	18.9483	13.6872	30.447	39.6906	15.7449	24.0984	36.4632	15.5073	17.8311	10.0419	17.3469	7.14156
38	15.5274	18.1607	18.6769	16.4366	18.5095	29.9487	17.5417	19.2104	10.6255	21.8436	36.0545	21.3435	31.2711	27.2452
39	13.3594	10.9123	8.81251	11.0112	12.9306	7.20907	14.2348	15.5999	9.36484	9.11795	10.8292	11.5296	14.2993	6.58584
40	13.6562	20.8527	22.0026	17.304	27.8968	24.6014	9.08783	20.1244	18.0011	23.5115	12.2412	16.1398	19.3399	17.7751
41	15.5631	12.8384	10.9685	22.0836	17.4846	16.5301	18.3082	13.9007	12.5767	28.2976	14.9275	32.8858	23.5115	22.5888
42	33.7912	23.3034	32.8815	28.3312	7.59411	28.7776	13.3892	28.0229	50.988	14.0422	34.9537	31.7239	22.2906	62.2888
43	22.3361	11.3349	18.6261	7.3212	8.19234	18.4901	8.0278	19.0544	20.7054	11.1739	16.3744	9.19108	18.2642	10.3457
44	20.7367	16.0357	13.459	9.04417	13.1244	14.9534	10.0833	35.4525	18.6691	12.1665	14.2219	21.5883	20.3228	13.3134
45	41.4371	23.1102	20.7343	37.4963	78.5707	50.0173	47.7265	82.4853	46.8021	23.4185	57.3982	38.4876	29.7594	48.5272
46	20.2465	30.5573	26.5302	23.0445	14.2782	20.036	14.4701	12.0316	12.2009	11.3628	11.6302	16.8751	19.6808	15.4664
47	18.2605	16.1714	22.5249	6.33434	24.7352	22.0996	22.8008	13.1997	34.5614	20.9837	20.8512	16.9471	27.111	14.4935
48	52.0952	23.034	45.1163	24.5475	58.7583	43.8778	34.1357	97.8649	37.6599	64.9253	24.4129	25.6777	30.0386	38.2896
49	33.9586	19.9104	22.5966	35.6127	33.8156	33.1216	52.5227	39.9267	21.6077	93.2326	44.4746	30.0863	23.9379	34.8005
50	25.7689	19.6881	41.1407	19.1436	19.2095	25.9445	33.8526	60.2589	16.1616	29.1489	11.5751	50.777	16.0712	48.5136
51	26.3096	15.4377	21.6685	23.0418	24.2954	24.6834	30.1102	25.4096	33.1479	13.3154	22.505	17.3555	18.4578	21.2809

## Sheet: low-medium frequency
	Low-medium frequency
	eyes open	eyes closed	1D myopia	2D myopia	3D myopia	4D myopia	5D myopia	6D myopia	1D hyperopia	2D hyperopia	3D hyperopia	4D hyperopia	5D hyperopia	6D hyperopia
1	8.63	12.57	12.64	10.42	12.54	9.48	22.04	13.6	12.46	10.33	13	21.52	18.8	23.51
2	6.74	5.58	5.24	5.71	7.09	6.29	5.88	4.18	6.67	5.87	4.73	5.59	6.67	6.47
3	6.09	9.17	15.86	7.61	7.23	7.44	9.62	8.1	12.46	7.25	7.47	8	6.27	15.56
4	13.31	14.83	11.82	8.45	19.1	15.78	8.9	11.78	11.36	21.58	13.49	17.54	22.78	21.98
5	13.75	12.79	6.3	6.12	5.16	4.68	4.96	6.96	3.96	4.62	6.31	5.42	4.9	6.75
6	12.37	11.05	6.57	7.49	9.83	10.61	9.44	9.78	7.32	13.21	10.46	10.16	10.25	13.67
7	6.4	10.26	9.36	9.67	6.05	6.48	7.04	10.27	7.49	10.51	7.8	5.08	9.14	9.12
8	7.1	9.06	7.63	6.8	6.4	6.71	5.24	5.93	7.29	7.32	6.34	6.5	6.95	6.1
9	11.77	8.89	9.18	11.08	9.89	8.43	7.93	5.77	8.18	5.87	11.69	9.7	7.53	9.14
10	5.03	6.54	4.83667	5.79	4.12333	4.87	4.17667	4.35	4.81667	4.37	5.73667	6.29667	6.39333	4.66
11	6.94	7.74	5.62	6.5	6.46	5.68	4.26	7.58	7.8	8.15	9.22	7.86	6.73	4.97
12	11.51	8.75	5.97	4.48	4.91	6.61	9.78	9.01	6.69	8.39	12.16	7.69	7.31	9.56
13	8	10.9	5.12	7.39	4.86	9.04	8.72	9.14	8.82	6.76	10.58	10.46	10.04	8.31
14	6.29	6.25	6.83	8.05	6.86	8.09	11.14	6.78	6.31	10.18	5.09	6.58	5.89	6.85
15	18.3	16.5	7.57	11.69	9.46	7.27	7.27	7.8	11.84	8.97	8.74	6.74	7.17	10.4
16	10.81	12.97	18.65	18.07	8.41	11.08	10.17	11.32	6.78	8.32	14.59	13.76	12.91	16.26
17	10.59	10.49	6.33	7.89	6.43	12.59	6.96	14.14	8.96	10.6	10.01	7.94	9.14	9.43
18	9.02	7.96	9.79	9.76	10.04	12.8	7.27	12.88	7.75	13.26	15.61	21.46	11.43	18.55
19	7.21	10.63	8.73	7.88	8.21	7.61	9.04	7.8	10.54	9.22	13.57	12.48	11.38	11.6
20	8.54	10.02	8.18	7.48	9.1	9.04	7.06	8.31	10.65	9.01	10	11.73	13.54	16.04
21	11.44	9.92	6.99	8.82	11.26	12.07	16.54	16.06	11.75	8.45	10.37	8.63	15.81	12.49
22	5.69	7.98	4.78	5.43	5.98	8.93	6.99	7.04	6.97	5.63	8.82	6.4	5.57	9.21
23	8.16	9.83	7.84	8.59	12.53	15.01	13.63	10.68	7.6	7.17	8.56	8.2	17.4	15.04
24	5.42	12.83	5.84	6.35	6.02	5.72	6.06	5.11	6.74	8.51	6	6.05	5.7	6.93
25	6.21	9.35	6.64	11.23	18.12	11.4	10.51	4.4	14.53	7.37	7.45	18.19	11.99	6.53
26	8.55736	15.7881	8.50746	8.99577	9.3767	8.13578	10.0123	10.794	7.70218	7.21517	10.5688	11.0159	15.5888	9.03947
27	9.21651	7.46623	8.36412	8.24102	8.70588	11.3172	8.88076	8.08548	12.9545	10.5652	7.83271	8.41256	7.47779	21.3558
28	7.00331	7.75627	5.30295	5.87812	3.93752	4.91795	4.07514	5.9488	5.77639	4.27584	4.85401	7.03796	5.39904	4.42961
29	0.413979	0.672586	0.391375	0.409506	0.468886	0.505516	0.332263	0.439161	0.349836	0.304663	0.327708	0.381297	0.362793	0.498228
30	12.0195	27.4566	21.461	23.9333	11.8849	11.2325	8.29872	11.9685	6.48965	12.4738	11.5762	8.23686	14.6451	15.9015
31	13.7255	25.4857	23.5458	12.2051	16.3643	9.89237	14.4661	19.498	17.586	21.3275	17.3625	16.1862	8.60948	18.7431
32	8.7493	20.6335	8.43449	7.80092	8.22928	9.4363	7.40313	10.5727	9.47802	10.1364	10.3939	12.316	16.1259	11.5555
33	8.37954	11.9869	15.3229	15.8418	12.8303	13.0654	7.11572	9.71471	14.5901	11.5958	11.9755	15.9536	12.4858	14.1915
34	12.909	9.85638	8.61885	7.02133	6.49573	10.5826	8.14444	10.048	7.83313	5.89019	7.02932	8.5054	10.0404	8.238
35	11.587	16.2252	9.84873	8.37086	10.7635	10.0205	8.5012	10.8823	11.418	8.95514	10.8905	12.4823	14.3063	14.1253
36	8.69184	8.42078	5.82156	5.5554	4.95598	5.08538	6.32275	9.25842	5.64019	7.32893	6.62481	7.43626	9.15115	6.64917
37	6.44683	7.69383	6.7319	6.57059	10.5855	10.2874	6.99	9.05738	7.35341	7.88289	6.47834	5.82111	7.63606	11.1196
38	4.69082	12.8288	7.40452	7.16233	7.69941	9.22022	7.19756	7.01404	7.02006	7.59871	33.2906	7.38611	6.63041	8.35494
39	4.99343	7.21774	7.11048	5.20685	7.31704	8.80146	6.74647	7.08856	5.2216	5.86887	4.48537	5.56557	6.79121	4.33004
40	6.72504	10.5539	7.59222	5.39156	6.83564	7.21698	7.00335	5.52946	8.29874	6.9468	7.11329	8.3287	7.05177	9.58859
41	7.30585	11.1563	5.97499	6.95307	6.64781	7.85052	11.3847	9.65874	4.98232	8.21575	9.16106	12.652	10.5562	10.3277
42	12.9098	23.6367	18.4386	8.44282	11.7744	10.8679	9.13291	14.4453	13.5101	11.9203	12.4246	22.3783	10.8542	14.5334
43	9.34734	10.0704	6.35629	5.85132	7.39553	8.46413	7.04897	5.82054	7.21198	6.58857	8.04839	7.85343	6.87418	11.1697
44	5.97467	10.2482	7.98005	7.83901	6.31886	11.0019	8.16264	10.1693	10.0418	8.76371	6.78434	10.7245	11.7064	9.70482
45	11.4388	14.3576	12.5224	15.1838	23.492	15.3625	20.6892	17.45	25.2788	15.7688	14.4656	11.5692	17.0103	16.6271
46	5.31756	6.23324	5.52418	5.32692	5.70233	8.66024	6.42358	7.51504	3.88296	5.20022	5.27881	6.68926	5.84338	5.20326
47	10.7349	14.5649	11.1563	14.2828	13.9267	11.3694	17.3886	17.953	11.5132	12.5379	17.5357	15.1533	11.8014	12.2562
48	20.2043	25.8328	15.8226	23.2505	17.0789	23.2065	20.7604	25.6637	20.0429	21.9518	17.6892	11.938	15.3323	15.6175
49	12.2089	9.51435	10.8306	11.6221	17.5605	20.4913	13.6518	8.99907	14.2934	20.379	15.3724	14.4039	11.0411	10.894
50	9.52904	13.032	8.47847	6.24915	9.07237	9.93968	12.2779	16.6687	11.5806	9.2789	8.9449	25.794	12.9329	18.7592
51	17.9808	15.781	13.6312	10.9891	11.6023	10.8127	15.0839	11.2324	10.9032	14.0652	11.1576	15.1435	16.0934	14.5876

## Sheet: high-medium frequency
	High-medium frequency
	eyes open	eyes closed	1D myopia	2D myopia	3D myopia	4D myopia	5D myopia	6D myopia	1D hyperopia	2D hyperopia	3D hyperopia	4D hyperopia	5D hyperopia	6D hyperopia
1	4.4	4.67	5.1	5.49	5.09	4.62	5.52	5.04	4.95	4.92	6.28	5.54	3.83	5.12
2	2.26	3.3	2.17	2.08	2.88	1.99	1.81	1.38	2.63	2.21	1.38	1.92	1.51	1.55
3	2.59	3.4	6.41	2.73	2.56	2.91	6.16	3.86	4.73	2.55	2.32	2.25	4.14	2.99
4	3.14	4.01	3.27	3.13	5.06	7.2	6.29	3.65	3.17	3.01	3.57	7.21	6.1	4.95
5	5.38	3.63	2.95	2.29	2.11	2.23	3.04	2.14	3.07	2.94	3.04	2.82	3.16	2.75
6	4.45	1.67	1.49	1.83	2.62	3.31	3.23	3.05	2.29	2.63	2.87	2.63	3.47	2.25
7	2.56	5.63	3.64	2.65	3.32	1.79	2.32	2.8	3.36	2.04	1.41	2.65	2.22	3.06
8	1.98	2.41	1.39	1.63	2.71	2.61	1.97	2.42	2.73	2.05	2.67	2.47	1.75	2.21
9	2.58	2.59	2.72	4.26	2.37	3.16	3.11	3.04	2.97	3.27	2.98	2.44	3.83	3.98
10	2.56	3.05	1.93	2.12	1.95	2.24	1.65	1.74	2.13	2.75	2.21	2.8	2.85	2.45
11	1.41	2.79	2.04	1.88	1.67	1.67	1.83	2.34	1.4	2.69	2.06	2.03	1.84	6.67
12	2.43	4.41	1.77	1.64	2.35	2.71	3.57	2.31	2.6	3.66	2.53	2.26	3.38	2.7
13	3.08	4	2.56	2.47	2.4	3.15	2.41	2.66	3.01	2.87	3.32	3.09	2.76	3.05
14	1.75	3.66	2.23	2.47	2.96	3.72	3.53	3	2.95	2.02	2.16	1.75	2.16	3.34
15	4.34	3.67	2.28	3.69	2.92	2.75	2.44	2.05	4.39	2.38	2.45	1.76	1.78	1.94
16	3.96	2.76	4.7	5.4	1.86	3.26	2.67	2.61	1.82	2.55	3.14	3.29	4.83	3.68
17	2.93	4.22	1.58	1.88	1.54	4.7	1.6	3.97	2.06	1.89	1.99	2.17	4.4	3.12
18	2.11	3.04	3.55	3.55	4.21	4.61	2.77	8.14	2.19	6.16	7.43	3.48	2.91	2.21
19	2.4	3.84	2.35	2.29	2.39	3.1	2.53	2.44	2.57	3.29	3.28	2.74	3.96	4.02
20	2.2	3.41	1.82	2.84	3.55	3.42	2.32	3.16	2.78	5	4.37	3.5	2.86	3.29
21	6.24	4.04	2.26	2.3	3.16	2.56	3.46	5.87	4.38	3.1	3.11	5.02	3.98	4.57
22	1.54	2.26	2.01	1.73	1.86	2.22	2.3	2.25	2.14	2.5	1.29	1.74	2.05	2.24
23	3.86	3.45	1.82	2.03	3.47	4.07	6.47	4.84	2.08	2.49	1.8	3.78	3.87	2.16
24	1.99	4.49	1.97	2.59	1.72	1.95	2.19	2.09	2.35	2.31	2.43	2.99	2.28	2.86
25	2.03	2.02	2.32	3.97	6.58	4.14	3.09	1.11	3.64	1.81	6.32	2.75	2.37	2.16
26	2.38274	6.26975	3.5829	5.13616	2.73142	3.32932	4.0061	4.16273	3.69354	2.76204	3.91487	3.15087	4.20162	3.62833
27	2.451	2.86534	3.41556	2.61365	3.79175	2.86007	3.07984	3.42058	4.08056	3.38462	3.05692	3.2668	3.18472	4.19655
28	1.43033	4.0937	1.49627	1.41876	1.25465	1.63987	2.30059	2.57163	1.86819	1.52475	2.31579	2.49919	1.76359	2.06168
29	2.73283	2.75778	2.47502	2.18766	2.1724	2.30775	1.94888	2.39822	2.12752	2.07073	2.19533	1.49955	2.30331	2.67919
30	3.58987	6.22918	8.44783	7.58132	6.04432	4.15241	3.77131	3.737	2.62591	2.99369	4.04102	2.6475	5.21135	5.1201
31	2.74606	6.62537	7.52521	4.64516	3.41572	2.63236	3.78066	6.87679	4.04834	5.92905	3.70482	3.58947	2.80713	5.85598
32	3.84988	8.3154	3.88641	3.03257	3.94464	4.32054	3.85395	5.44518	4.02945	3.47277	3.94049	3.8503	6.71205	4.79322
33	3.19231	4.81497	5.01232	4.71471	4.07555	3.99621	3.69277	3.02573	5.00617	4.52267	3.71075	5.2622	4.47521	4.85293
34	4.64004	2.70625	2.12274	2.35764	1.65012	2.81427	2.31718	3.73258	2.52932	2.34251	1.71987	1.7345	3.35291	1.88518
35	3.1295	4.53396	3.0236	2.90538	3.34027	3.5243	3.10906	2.5199	2.53542	2.74087	3.20976	3.62302	3.76163	3.51643
36	2.61125	3.69076	1.70085	1.92551	1.85217	1.56975	1.37547	3.22512	1.66654	2.02702	1.64135	2.21626	2.41478	2.85327
37	2.33506	3.11723	3.18793	3.23614	2.93923	4.98867	3.40632	2.39887	2.9699	4.20503	2.75241	2.53857	2.44993	3.76701
38	2.00944	4.05311	2.25519	2.13804	2.40456	3.23328	2.79714	1.82936	2.50275	5.17828	6.24339	3.18301	2.2775	2.58507
39	2.07627	2.89192	2.33508	1.66678	1.96795	2.51941	1.94716	2.63945	1.91419	2.03768	2.02629	1.87965	1.44411	1.61513
40	2.21469	4.17875	3.71002	2.28406	2.40287	3.37244	2.16131	3.4464	3.88004	3.10566	2.75456	3.9165	2.34295	3.60258
41	2.78868	4.88107	2.29619	2.73062	3.13484	2.80756	3.97377	3.13653	1.87493	3.72583	2.24307	5.02396	4.47579	2.89948
42	3.83385	5.76203	3.60373	2.50501	4.34671	3.87673	3.17911	3.83634	4.16991	3.90022	3.5784	5.00675	3.89372	5.08923
43	2.5254	3.42246	2.34077	2.2436	2.47688	2.29708	2.62282	1.92661	2.47988	2.31756	2.04967	1.9576	1.90666	2.37894
44	3.44394	3.60654	3.15583	2.3952	2.56235	3.84464	3.76591	3.50972	3.74938	3.00076	3.03794	4.28537	3.83259	4.86285
45	3.92864	3.98826	3.13682	3.63187	5.11621	4.37254	5.59051	4.07425	4.60501	4.12146	4.26598	3.19851	4.51192	4.86389
46	2.11922	2.49482	1.53384	1.67745	1.4747	2.05386	1.4356	2.21625	1.87201	1.35829	1.63209	1.85647	1.76322	1.9578
47	4.00513	6.85392	4.99748	5.83917	6.19506	4.71689	5.60369	5.23493	5.07339	4.64954	6.30017	5.81988	4.91124	5.58574
48	6.15317	4.96083	4.48903	6.55503	6.17655	7.32979	6.28992	7.68387	6.312	6.49573	4.63424	4.03463	4.12168	4.13483
49	4.01511	3.72846	2.98658	5.12393	5.07289	6.66339	4.08466	3.13435	3.88112	5.41307	3.54263	3.21834	3.4116	3.15493
50	3.11479	4.71013	3.24184	2.57141	3.9927	4.96857	4.49213	6.82252	5.40648	3.32575	3.41885	6.37448	3.19877	5.75449
51	6.72598	5.31152	3.69203	4.41005	4.9144	4.22539	4.30129	4.37461	3.80222	4.61149	4.35458	4.69783	5.0785	4.19743

## Sheet: high frequency
	High frequency
	eyes open	eyes closed	1D myopia	2D myopia	3D myopia	4D myopia	5D myopia	6D myopia	1D hyperopia	2D hyperopia	3D hyperopia	4D hyperopia	5D hyperopia	6D hyperopia
1	0.69	0.89	0.8	0.79	1.13	0.63	1.29	0.96	0.92	0.69	0.72	1.01	1.35	0.75
2	0.44	0.58	0.42	0.36	0.45	0.49	0.39	0.29	0.56	0.35	0.33	0.39	0.36	0.26
3	0.38	0.65	1.1	0.39	0.5	0.55	1.06	0.58	0.6	0.39	0.44	1.31	0.53	0.45
4	0.54	0.94	0.43	0.69	0.92	0.72	1.43	0.77	0.56	1.37	0.54	1.07	1	0.72
5	1.55	0.8	0.69	0.45	0.41	0.5	0.7	0.55	0.56	0.52	0.68	0.79	0.68	0.7
6	0.61	0.3	0.24	0.29	0.45	0.44	0.78	0.36	0.42	0.79	0.41	0.53	0.33	0.32
7	0.33	1.22	0.8	0.69	0.59	0.51	0.5	0.65	0.7	0.78	0.5	0.56	0.61	0.72
8	0.35	0.42	0.3	0.43	0.29	0.38	0.29	0.51	0.42	0.36	0.29	0.43	0.7	0.38
9	0.47	0.41	0.43	0.91	0.38	0.56	0.61	0.39	0.51	0.34	0.54	0.55	0.72	0.55
10	0.42	0.41	0.37	0.3	0.26	0.31	0.24	0.29	0.33	0.27	0.31	0.3	0.29	0.5
11	0.29	0.69	0.46	0.41	0.38	0.35	0.31	0.56	0.34	0.4	0.58	0.35	0.32	2.77
12	0.54	0.72	0.39	0.33	0.43	0.39	0.48	0.56	0.31	0.49	0.72	0.51	0.55	0.38
13	0.43	0.49	0.5	0.41	0.44	0.6	0.51	0.55	0.74	0.46	0.66	0.54	0.35	0.56
14	0.36	0.43	0.29	0.42	0.67	0.51	0.46	0.33	0.59	0.44	0.33	0.32	0.27	0.41
15	1.13	0.59	0.35	0.59	0.37	0.36	0.25	0.34	0.66	0.53	0.5	0.48	0.34	0.29
16	0.94	0.59	1.27	1.46	0.35	0.56	0.62	0.4	0.3	0.42	0.47	0.54	1.03	0.72
17	0.59	0.93	0.45	0.4	0.35	1.2	0.52	1.09	0.35	0.43	0.4	0.49	0.47	0.6
18	0.38	0.51	0.71	0.58	0.56	0.7	0.54	1.63	0.28	0.72	1.55	0.58	0.89	0.48
19	0.43	0.77	0.56	0.41	0.46	0.59	0.43	0.44	0.59	0.44	0.54	0.49	0.56	0.65
20	0.45	0.6	0.29	0.35	0.47	0.32	0.28	0.3	0.35	0.48	0.78	0.82	0.54	0.42
21	0.73	0.79	0.4	0.4	0.57	0.6	0.53	1.03	0.77	0.51	0.6	0.8	0.76	1.01
22	0.34	0.37	0.51	0.21	0.27	0.46	0.48	0.5	0.55	0.37	0.39	0.54	0.44	0.47
23	0.52	0.69	0.3	0.48	0.46	0.93	1.48	1.35	0.38	0.46	0.33	0.55	0.41	0.36
24	0.31	0.81	0.35	0.59	0.29	0.33	0.42	0.36	0.37	0.37	0.39	0.46	0.42	0.35
25	0.45	0.39	0.44	0.63	1.86	0.71	0.73	0.21	0.74	0.29	0.3	0.37	1.28	0.34
26	0.43698	0.766694	0.587441	0.820412	0.491981	0.443842	0.622362	0.590798	0.440516	0.538313	0.685217	0.439154	1.13228	0.523916
27	0.411427	0.56598	0.767466	0.615572	0.644089	0.567813	0.735469	0.6243	0.917084	0.779505	0.475989	0.578656	0.48257	2.15664
28	0.287755	0.79964	0.23771	0.258612	0.299446	0.266972	0.286614	0.35001	0.378699	0.302142	0.245027	0.38269	0.263538	0.259627
29	7.2554	10.7746	7.94985	8.93653	7.83956	6.82617	6.86588	6.77613	5.72643	7.33135	8.4606	9.4391	9.16185	12.1137
30	0.751973	0.943004	1.15505	1.81611	1.24953	0.56814	0.596199	0.718475	0.431489	0.640493	0.760817	0.431963	0.699567	0.991102
31	0.581492	1.12684	0.492222	0.814634	0.676792	0.480624	0.718317	1.39273	0.892514	1.22117	0.53099	0.682094	0.416145	1.41236
32	0.436618	1.41047	0.704573	0.449742	0.481148	0.579681	0.563319	0.812015	0.57681	0.697633	0.859041	0.814959	1.07684	0.692933
33	0.555783	0.703989	1.06192	1.2954	0.830745	0.850393	0.58045	0.495791	0.779957	0.713457	0.844746	1.15286	1.02313	0.964167
34	1.08938	0.450395	0.388481	0.325877	0.313286	0.389892	0.51708	0.650733	0.409277	0.328127	0.319613	0.43251	0.568429	0.399325
35	0.323448	0.620114	0.413858	0.35875	0.528355	0.345433	0.415222	0.514787	0.374451	0.350204	0.485786	0.63322	0.640628	0.422032
36	0.567703	0.733842	0.293536	0.277348	0.343521	0.320077	0.226396	0.738613	0.299995	0.398812	0.336842	0.552367	0.605722	0.526415
37	0.384754	0.399214	0.641816	0.527769	0.515409	1.00071	0.69944	0.575846	0.508825	0.754685	0.440703	0.434772	0.519354	0.870827
38	0.232784	0.654435	0.569404	0.31229	0.400552	0.418162	0.503505	0.354896	0.408869	0.73701	4.05202	0.567529	0.382607	0.28393
39	0.358186	0.390446	0.55318	0.235515	0.340158	0.617395	0.302097	0.448601	0.278539	0.373895	0.252711	0.379105	0.331027	0.277392
40	0.327429	0.847695	0.74234	0.421453	0.374564	0.574725	0.422144	0.592724	0.617623	0.566442	0.42845	0.640438	0.556304	0.653411
41	0.554739	0.547489	0.408467	0.35429	0.558662	0.514785	0.485013	0.53886	0.368528	0.673277	0.382455	1.13606	0.578584	0.688576
42	0.587088	1.0001	0.563124	0.512524	0.686783	0.484164	0.60735	0.638956	0.903279	0.556425	0.831103	0.746477	0.501877	1.10611
43	0.59107	0.568915	0.468159	0.301782	0.422357	0.420256	0.486597	0.402226	0.424989	0.447487	0.374763	0.461177	0.358492	0.435298
44	0.560179	0.57797	0.516718	0.525452	0.47979	0.526955	0.545303	0.660702	0.546874	0.584436	0.526633	0.970307	0.832643	0.715198
45	0.824278	0.693389	0.537419	0.555831	0.848188	0.753697	0.779484	0.758284	0.726007	0.679567	0.585599	0.694218	0.976008	1.00384
46	0.434371	0.51175	0.399118	0.378161	0.328274	0.512996	0.343074	0.482156	0.287848	0.294599	0.343616	0.428543	0.394555	0.322801
47	0.58342	0.783945	0.784751	0.778246	0.960897	0.791431	0.957491	0.687955	0.671259	0.777897	0.981827	0.878108	0.859827	0.606434
48	0.842558	0.900026	0.729234	1.03022	1.17122	0.717544	1.03547	1.22793	0.720936	0.83271	0.657608	0.672147	0.653596	0.696332
49	1.01269	0.544071	0.608188	1.13139	1.10507	1.42065	0.746672	0.702565	0.871512	1.34301	0.604866	0.866303	0.559892	0.587572
50	0.581579	0.857159	0.685202	0.527118	0.618161	0.715318	0.790496	1.37856	0.631389	0.694597	0.51977	1.37764	0.708373	0.90434
51	1.24126	1.1197	0.797169	0.786337	0.987426	0.690186	0.960883	0.841091	0.81748	1.03082	0.71498	0.943041	1.05044	1.04689
